# Supplementary material
Source: Springer Nature journal article supplement (https://www.springermedizin.de/resource/supplementary/12876_2006_185_MOESM5_ESM.pdf/9438876)

## A. Small intestine cancer

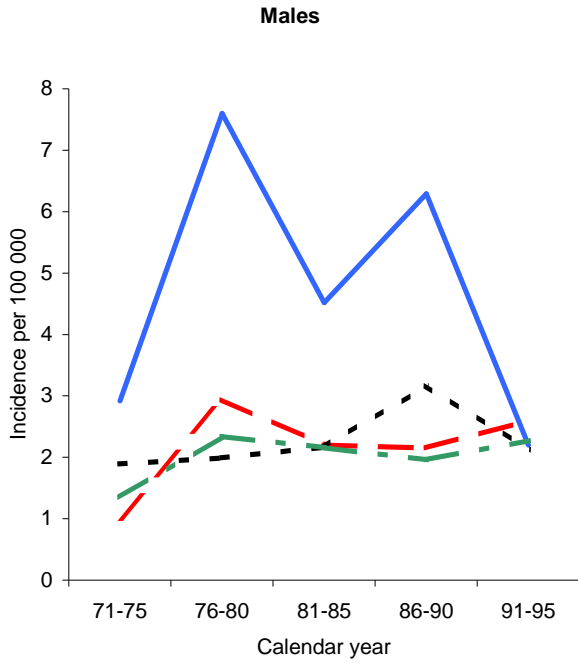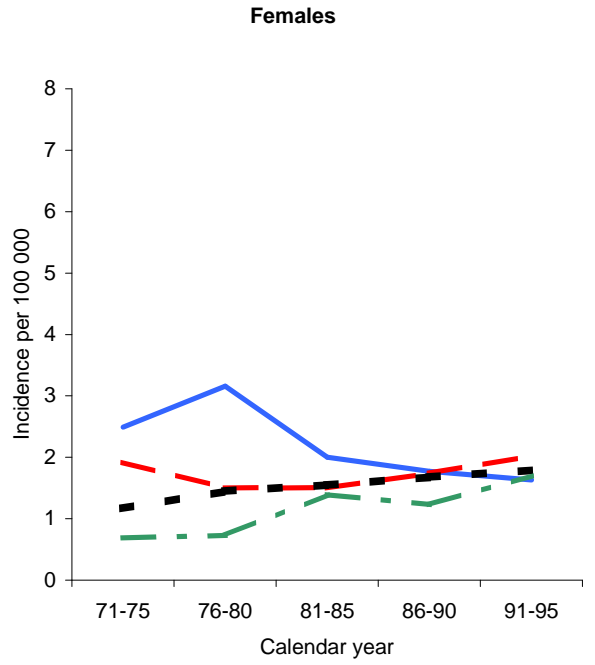

## B. Pancreas cancer

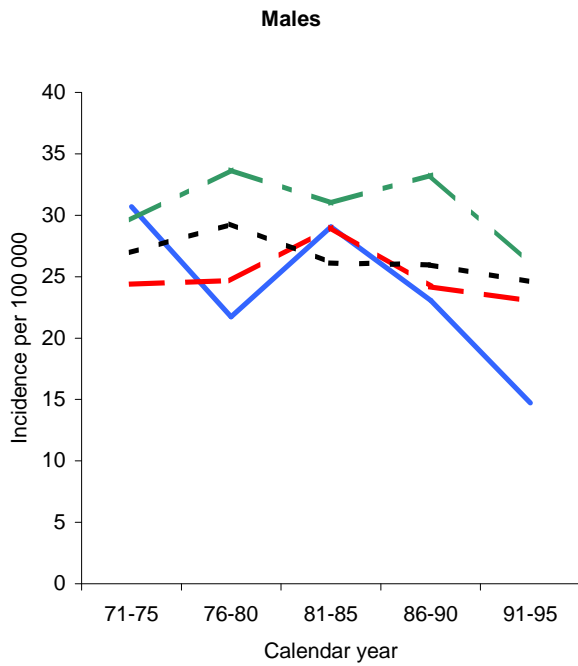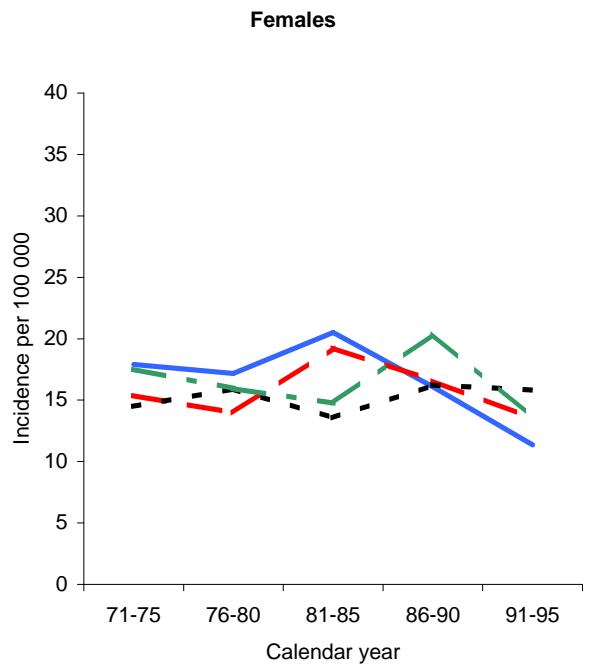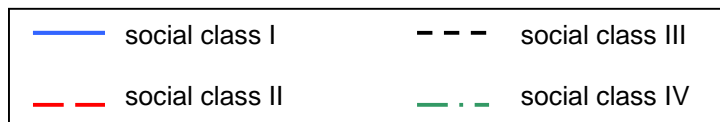

Supplement: MOESM5 [file 9438876]
